# Supplementary material
Source: publisher figshare collection journal article supplement (https://tandf.figshare.com/ndownloader/files/13277192)
Supplement: Supplementary file 1 [file 13277192]

| Supplemental Table I: Demographic characteristics of patients with acute stroke stratified by race and ethnicity | | | |
| --- | --- | --- | --- |
| **Characteristic** | **Total**  N=140 | **African-American**  n=119 | **Hispanic**  n=21 |
| **Demographics**  Age, years  Male, # (%)  Female, # (%) | 61.21±14.56  66 (47)  74 (53) | 60.85±14.66  53 (45)  66 (55) | 63.2857±14.14  13 (62)  8 (38) |
| **Insurance Status # (%)**  Private  Medicare  Medicaid  Self-Pay | 16 (11)  62 (44)  34 (24)  28 (20) | 14 (12)  50 (42)  33 (28)  22 (18) | 2 (9)  12 (57)  1 (5)  6 (29) |

| Supplemental Table II: Demographic characteristics of patients with acute stroke stratified by insurance status | | | | | |
| --- | --- | --- | --- | --- | --- |
| **Characteristic** | **Total**  N=140 | **Private**  n= 16 | **Medicare** n=62 | **Medicaid**  n=34 | **Self-Pay**  n=28 |
| **Demographics**  Age, years, *  Male, # (%)  Female, # (%)  African-American, # (%)  Hispanic, # (%), Α,Β | 61.21±14.56  66 (47)  74 (53)  119 (85)  21 (15) | 59.8±14.41  7 (44)  9 (56)  14 (88)  2 (12) | 71.61±11.37  27 (44)  35 (56)  50 (81)  12 (19) | 51±9.16  16 (47)  18 (53)  33 (97)  1 (3) | 51.35±9.94  16 (57)  12 (43)  22 (79)  6 (21) |

*Significant differences in mean age at stroke between Medicare and Medicaid patients, with p=3.71E-17, by ANOVA with df=3 and p<0.05 considered statistically significant

Α- Significant differences in racial and ethnic makeup of Medicare versus Medicaid, with p=0.029, by Fischer’s exact probability test with two tailed p values and p<0.05 considered statistically significant

Β- Significant differences in racial and ethnic makeup of Medicaid versus Self-pay, with p=0.039, by Fischer’s exact probability test with two tailed p values and p<0.05 considered statistically significant.
